# Supplementary material for: Extreme climatic events drive mammal irruptions: regression analysis of 100-year trends in desert rainfall and temperature
Source: PubMed Central journal article supplement (PMC3501619; doi:10.1002/ece3.377), 2012-09-21

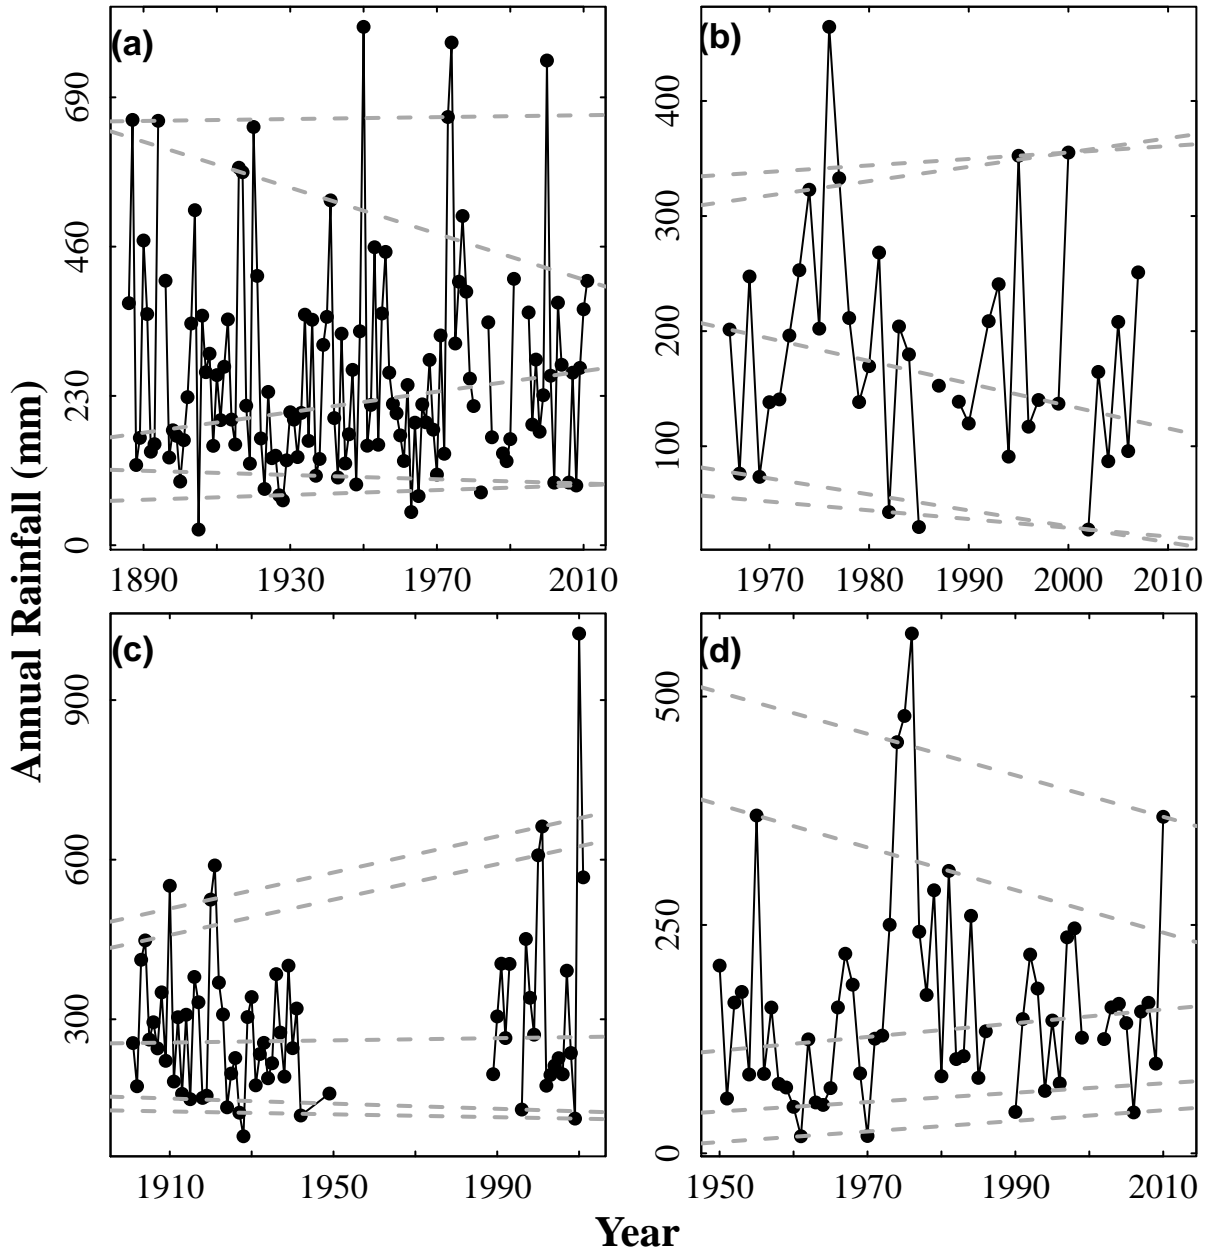

Supplement: ece30002-2645-SD1.pdf [file ece30002-2645-SD1.pdf]
